# Supplementary material for: Longitudinal unzipped carbon nanotubes with high specific surface area and trimodal pore structure
Source: Royal Society of Chemistry journal article supplement (doi:10.1039/c5ra22527b), 2016-01-01
Supplement: c5ra22527b1.pdf [file c5ra22527b1.pdf]

# Longitudinal unzipped carbon nanotubes with high specific surface area and trimodal pore structure

*Joah Han,<sup>a,b</sup> Wonbin Kim,<sup>b</sup> Hyun-Kyung Kim,<sup>c</sup> Hee-Chang Youn,<sup>c</sup> Joong Tark Han,<sup>d</sup> Woong Kim,<sup>b,\*</sup> and Kwang Chul Roh<sup>a,\*</sup>*

<sup>a</sup> Energy & Environmental Division, Korea Institute of Ceramic Engineering & Technology, Jinju-si 660-031, Republic of Korea, <sup>b</sup> Department of Materials Science and Engineering, Korea University, Seoul 136-713, Republic of Korea, <sup>c</sup> Department of Material Science and Engineering, Yonsei University, Seoul 120-749, Republic of Korea, and <sup>d</sup> Nano Carbon Materials Research Group, Korea Electrotechnology Research Institute, Changwon-si 642-120, Republic of Korea

## Results of characterization.

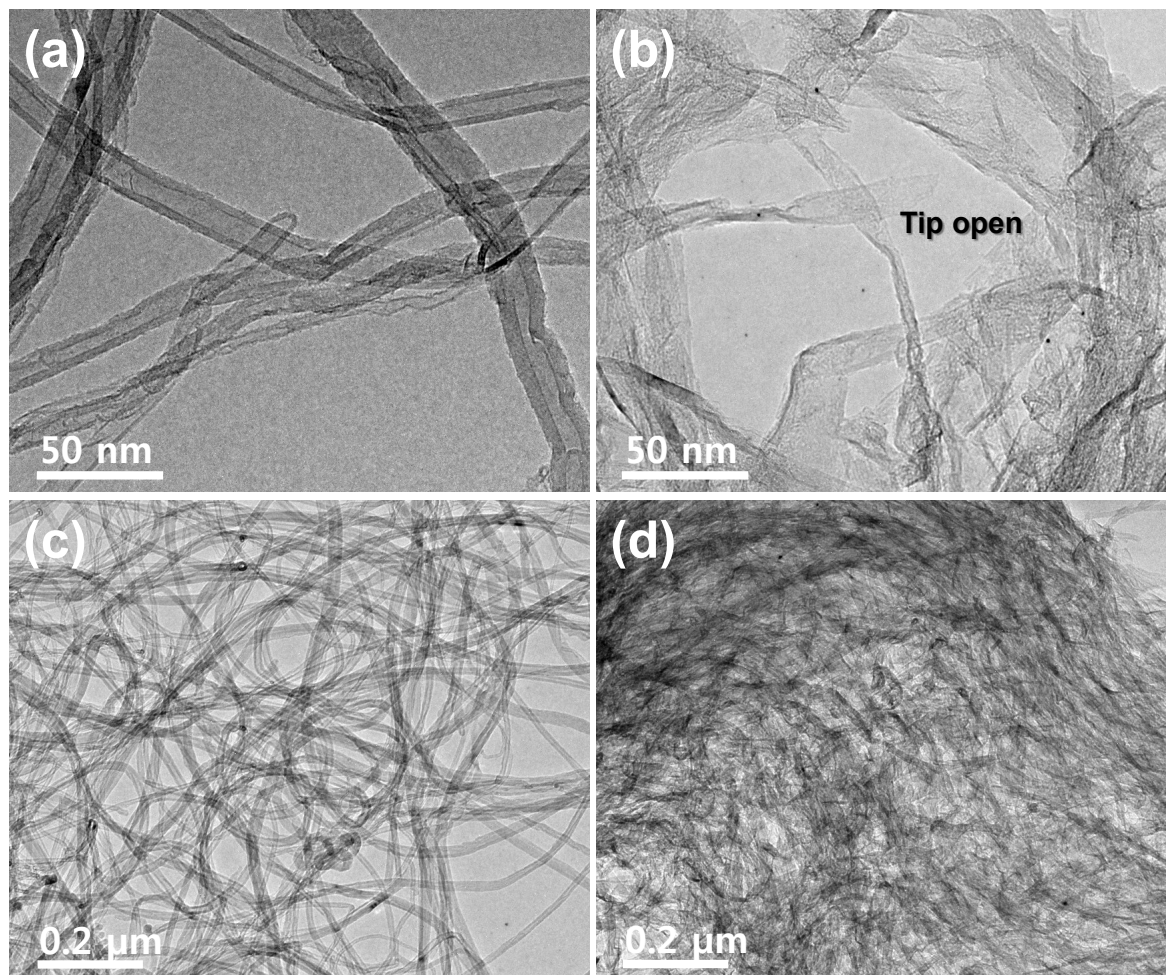

**Figure S1.** High resolution TEM images of (a) pristine MWCNTs with graphitic walls before the alkali activation and (b) tip opening of the MWCNTs after the activation, and low resolution TEM images of (c) the entangled MWCNTs before the activation and (d) aggregated MWCNTs after unzipping via the activation.

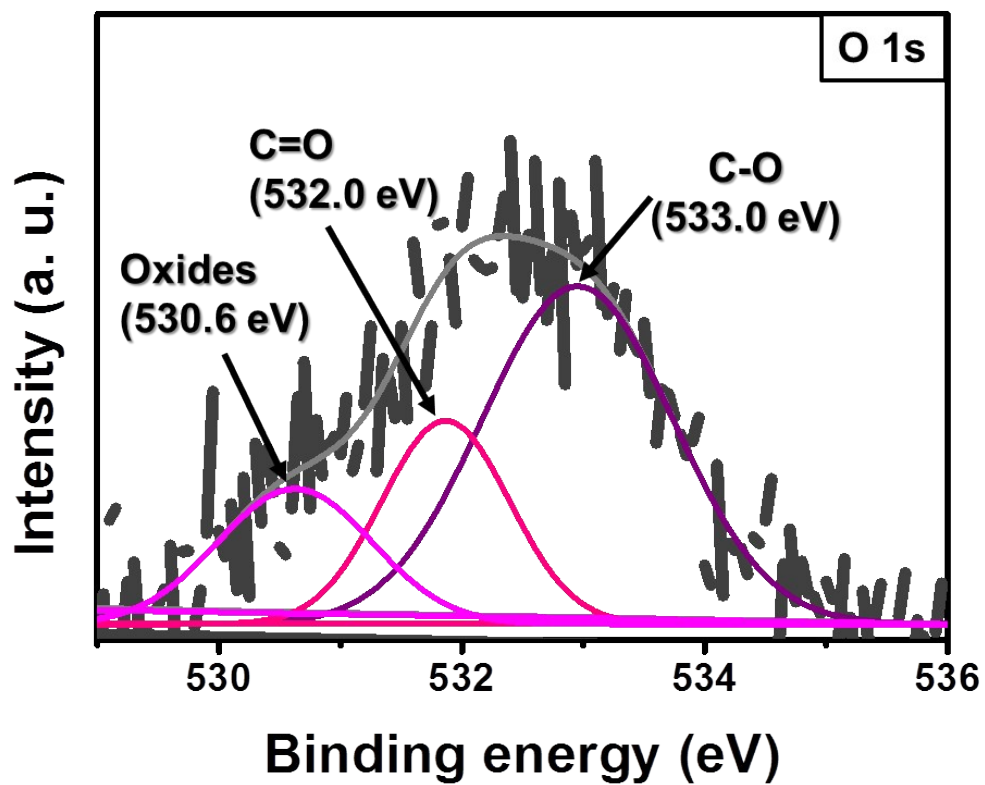

**Figure S2.** XPS O 1s spectra corresponding to the deconvolution of the C 1s spectra in Figure 4 (d) of the unzipped MWCNTs after the activation.

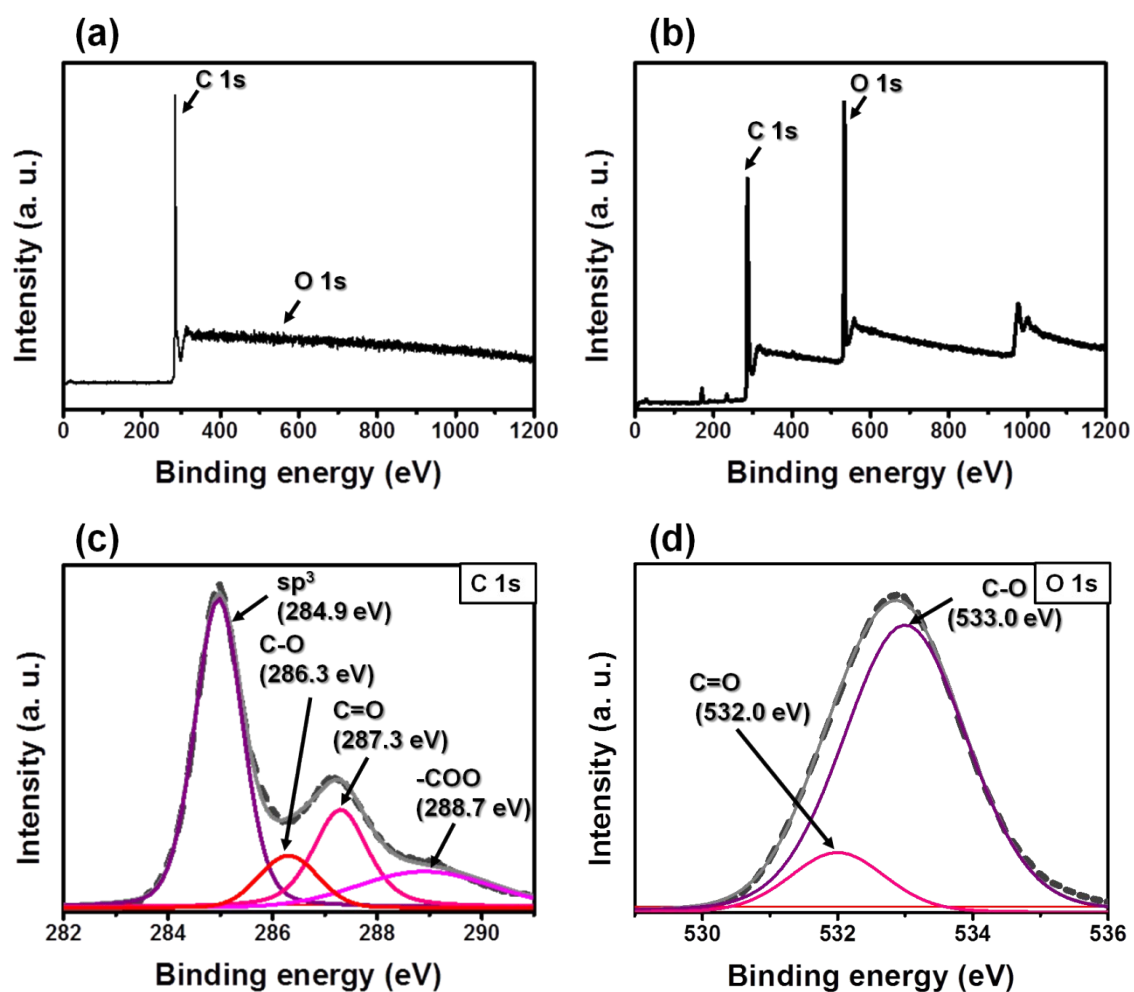

**Figure S3.** XPS survey spectra of (a) unzipped MWCNTs after alkali activation and (b) oxidized MWCNTs after acid treatment. (c) C1s spectra and (d) O 1s spectra of the oxidized MWCNTs after acid treatment.

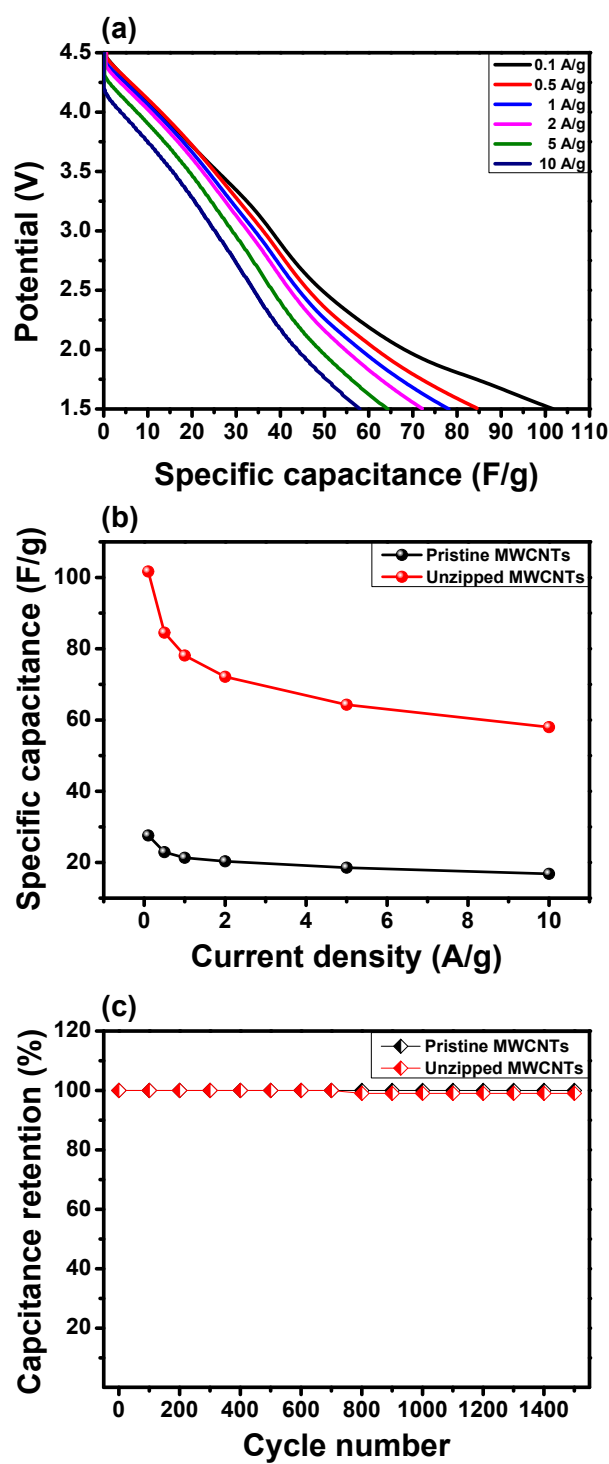

**Figure S4.** (a) Galvanostatic discharge curve at various current densities for unzipped MWCNTs, (b) rate capability at various current densities, and (c) capacitance retention during 1500 cycles for the pristine and unzipped MWCNTs.

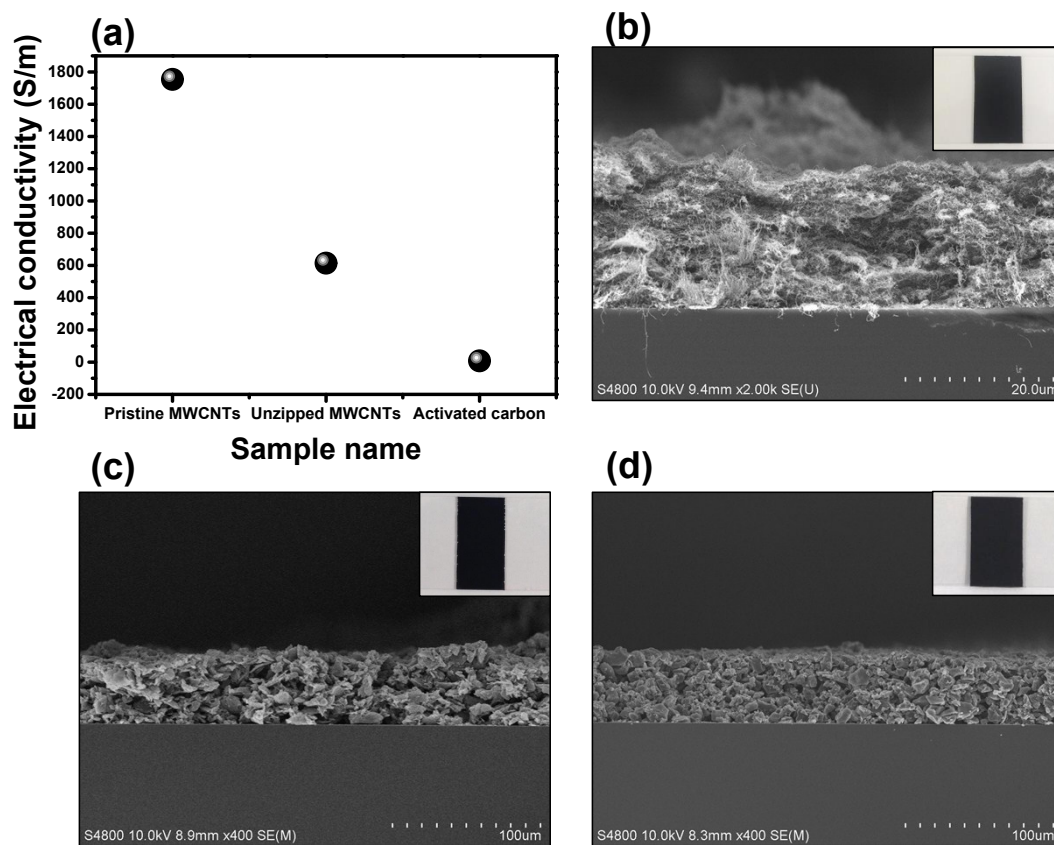

**Figure S5.** (a) Electrical conductivity of various samples and cross section SEM images of (b) pristine and (c) unzipped MWCNTs and (d) commercial activated carbon.
